# Supplementary material for: Expression of ALS-PFN1 impairs vesicular degradation in iPSC-derived microglia
Source: PubMed Central journal article supplement (PMC10954694; doi:10.1038/s41467-024-46695-w), 2024-03-20
Supplement: 41467_2024_46695_MOESM1_ESM.pdf [file 41467_2024_46695_MOESM1_ESM.pdf]

## SUPPLEMENTARY FIGURES

**a**

|                           | Code                 | Line Name                           | Genotype                               |
|---------------------------|----------------------|-------------------------------------|----------------------------------------|
| C71G-PFN1 isogenic group  | WT                   | KOLF2.1J: PFN1 C71G WT clone B03    | WT clone during C71G mutation editing  |
|                           | C71G <sup>+/-</sup>  | KOLF2.1J: PFN1 C71G het clone C01   | C71G/WT                                |
| M114T-PFN1 isogenic group | WT                   | KOLF2.1J: PFN1 M114T WT clone H09   | WT clone during M114T mutation editing |
|                           | M114T <sup>+/-</sup> | KOLF2.1J: PFN1 M114T het clone A08  | M114T/WT                               |
|                           | M114T <sup>+/+</sup> | KOLF2.1J: PFN1 M114T homo clone D12 | M114T/M114T                            |

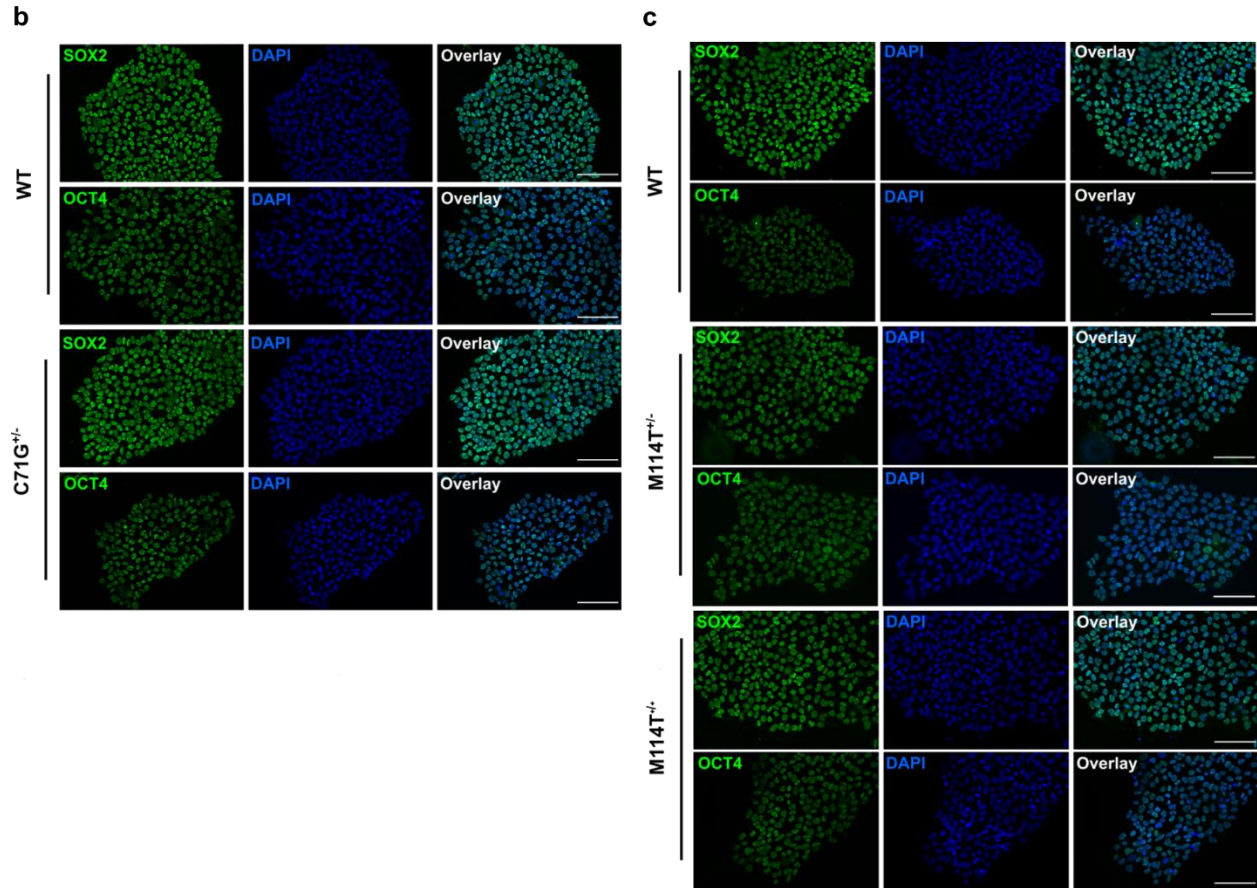

**Supplemental Figure 1. Pluripotency analysis of iPSC lines used in this study. a**, iPSC lines used in this report. **b-c**, Immunofluorescence images of pluripotency markers SRY-Box transcription factor 2 (SOX2; green) and octamer-binding transcription factor 4 (OCT4; green) in WT and C71G<sup>+/-</sup> iPSCs (**b**) and WT, M114T<sup>+/-</sup> and M114T<sup>+/+</sup> iPSCs (**c**). Representative images obtained from one analysis. Scale bar: 100  $\mu$ m.

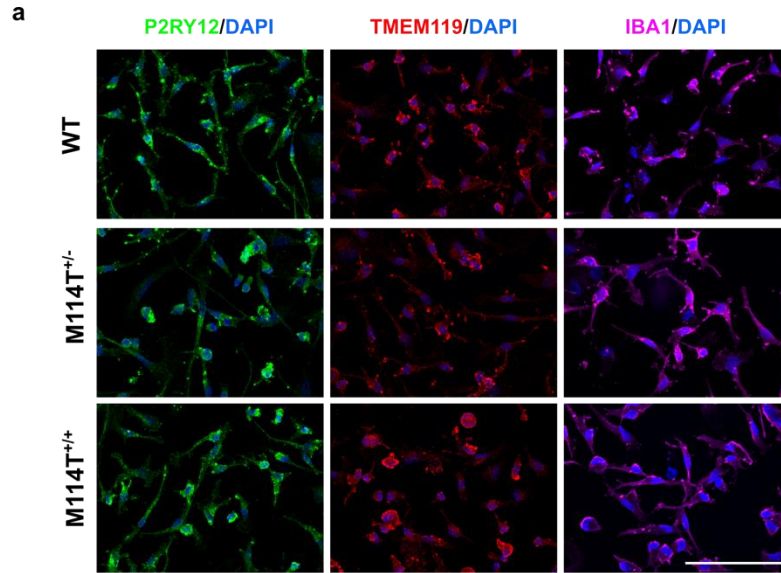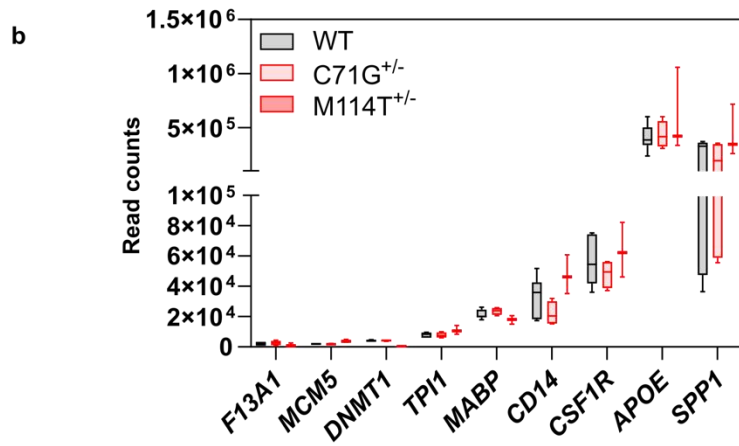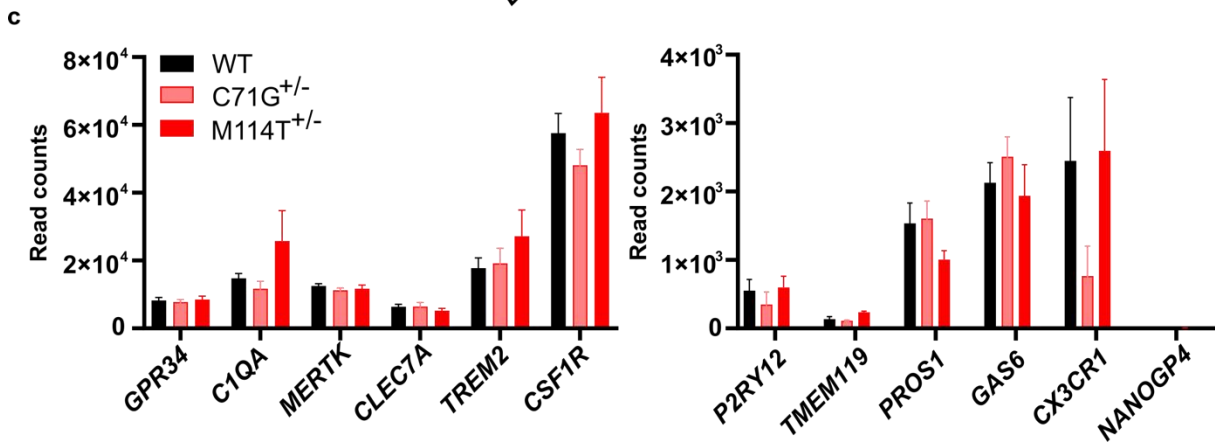

**Supplemental Figure 2. Expression of microglia and myeloid markers in ALS-PFN1 and isogenic control iMGs.** **a**, Representative immunofluorescence images of the microglia and myeloid markers P2RY12, transmembrane protein 119 (TMEM119), and ionized calcium-binding adapter molecule 1 (IBA1) in WT, M114T<sup>+/-</sup> and M114T<sup>+/+</sup> iMGs. Scale bar: 100 μm. **b**, Normalized read counts of genes associated with different microglia developmental stages expressed in mutant PFN1 and WT iMGs, including early-stage yolk-sac microglia progenitor gene *F13A1* and embryonic-microglia genes minichromosome maintenance complex component 5 (*MCM5*), DNA methyltransferase 1 (*DNMT1*), and triosephosphate isomerase 1 (*TPI1*) are shown. Also shown are adult-microglia genes V-Maf musculoaponeurotic fibrosarcoma oncogene homolog B (*MAFB*), monocyte differentiation antigen CD14 (*CD14*) and colony-stimulating factor-1 receptor (*CSFR1*), and the aging-related microglia genes Apolipoprotein E (*APOE*) and secreted phospho-protein 1 (*SPP1*). Box and whisker plots of WT n=7, C71G<sup>+/-</sup> n=4, and M114T<sup>+/-</sup> n=3 independent differentiations. **c**, Normalized read counts of the microglia-enriched genes *GPR34*, complement C1q A Chain (*C1QA*), *MERTK*, C-type lectin domain containing 7A (*CLEC7A*), triggering receptor expressed on myeloid cells 2 (*TREM2*), CSF1 receptor (*CSF1R*), *P2RY12*, *TMEM119*, *PROS1*, growth arrest specific 6 (*GAS6*), C-X3-C motif chemokine receptor 1 (*CX3CR1*), and the stem-cell related gene Nanog homeobox pseudogene 4 (*NANOGP4*) expressed in mutant PFN1 and WT iMGs. Bar graphs show mean ± SEM for WT n=7, C71G<sup>+/-</sup> n=4, and M114T<sup>+/-</sup> n=3 independent differentiations. Source data are provided as a Source Data file.

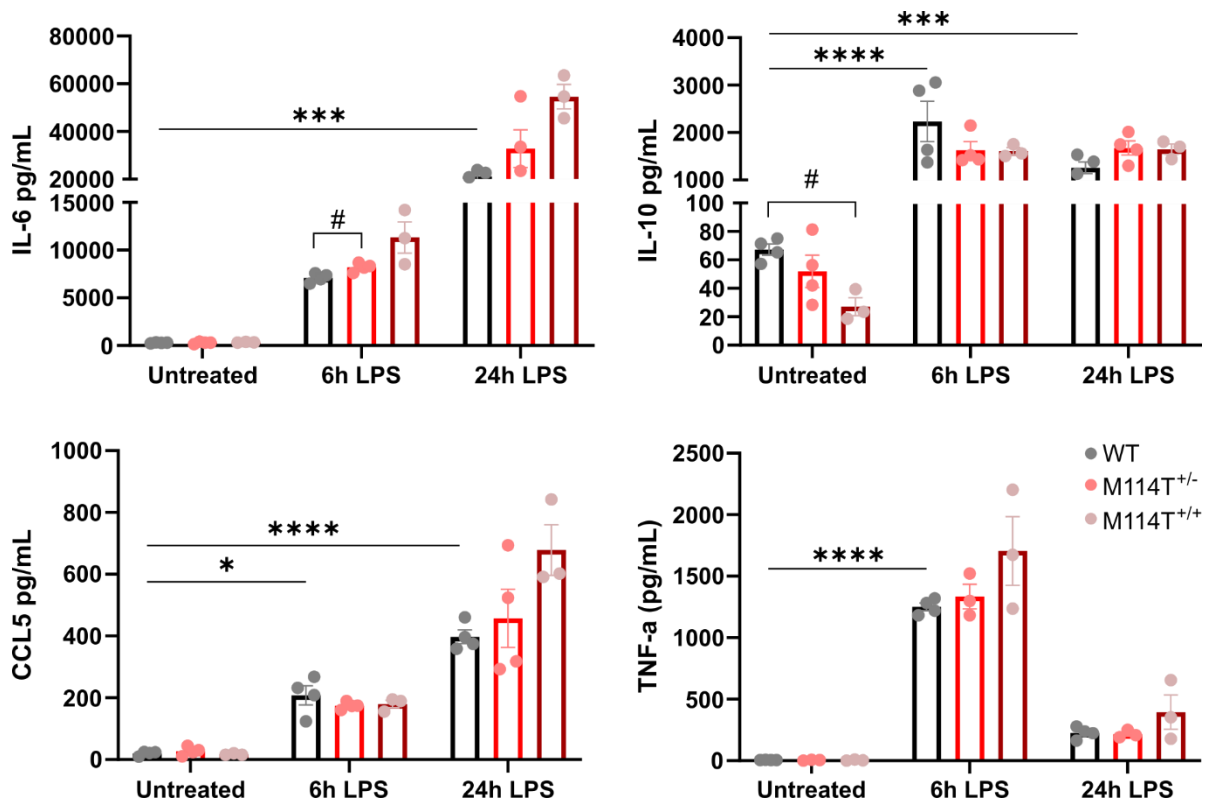

**Supplemental Figure 3. Cytokine secretion upon LPS stimulation in PFN1 M114T<sup>+/-</sup> and M114T<sup>+/+</sup> iMGs.** WT, M114T<sup>+/-</sup>, and M114T<sup>+/+</sup> iMGs secrete elevated levels of IL-6 (\*\**P*=0.0003), IL-10 (\*\**P*=0.0003, \*\*\*\**P*<0.0001), CCL5 (\**P*=0.0116, \*\*\*\**P*<0.0001), and TNF-α (\*\*\*\**P*<0.0001) after 6h or 24h of 100 ng/mL LPS stimulation compared to untreated cells. WT vs M114T<sup>+/-</sup> levels of IL-6 at 6h LPS (#*P* = 0.0444) and WT vs M114T<sup>+/+</sup> levels of IL-10 at 0h (#*P*=0.0234) were significantly different. All other WT vs M114T<sup>+/-</sup> and WT vs M114T<sup>+/+</sup> comparisons were not statistically significant. Statistics were determined by two-way ANOVA and Šidák's multiple comparisons test. P-values are listed only for WT cells for simplicity; all other statistical comparisons are defined in **Data S1**. Mean ± SEM for n=3-4 independent differentiations is shown for all bar graphs, with each data point representing an individual differentiation. Source data are provided as a Source Data file.

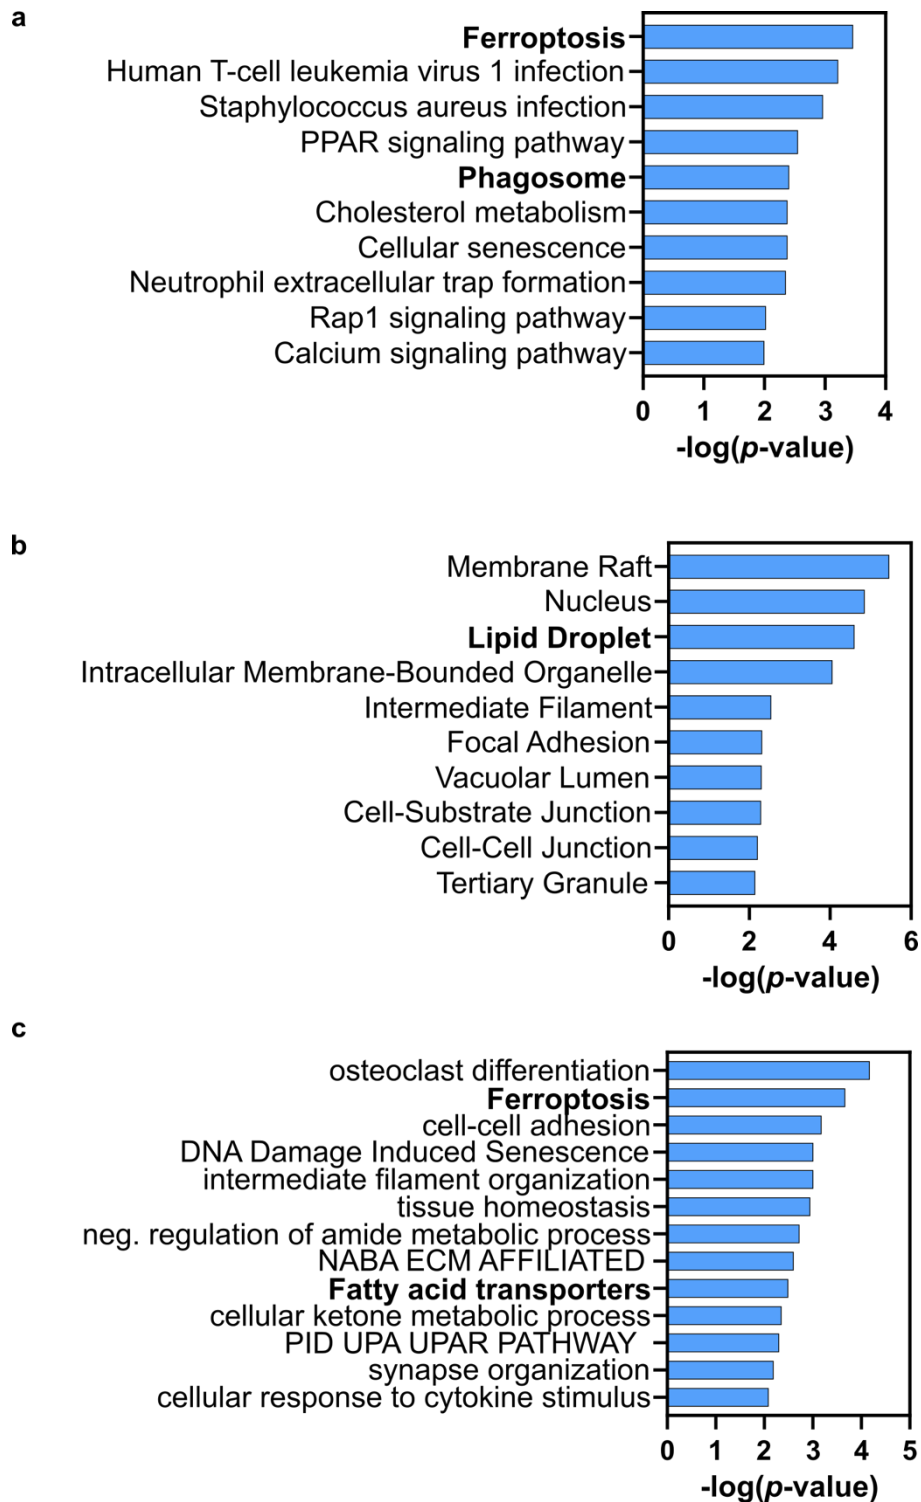

**Supplemental Figure 4. Additional functional enrichment analyses of differentially expressed proteins from the proteomics analysis of C71G<sup>+/-</sup> versus WT iMGs. a,b** Enriched terms obtained by Enrichr for KEGG pathway (a) and gene ontology cellular component (b) libraries. P-values were computed using a two-sided Fischer's exact test. **c**, Enriched terms generated by Metascape analysis. P-values were determined using the hypergeometric test and

Benjamini-Hochberg algorithm. Top 10 terms are shown for each analysis. Additional terms and statistical values can be found in **Data S4**. Source data are provided as a Source Data file.

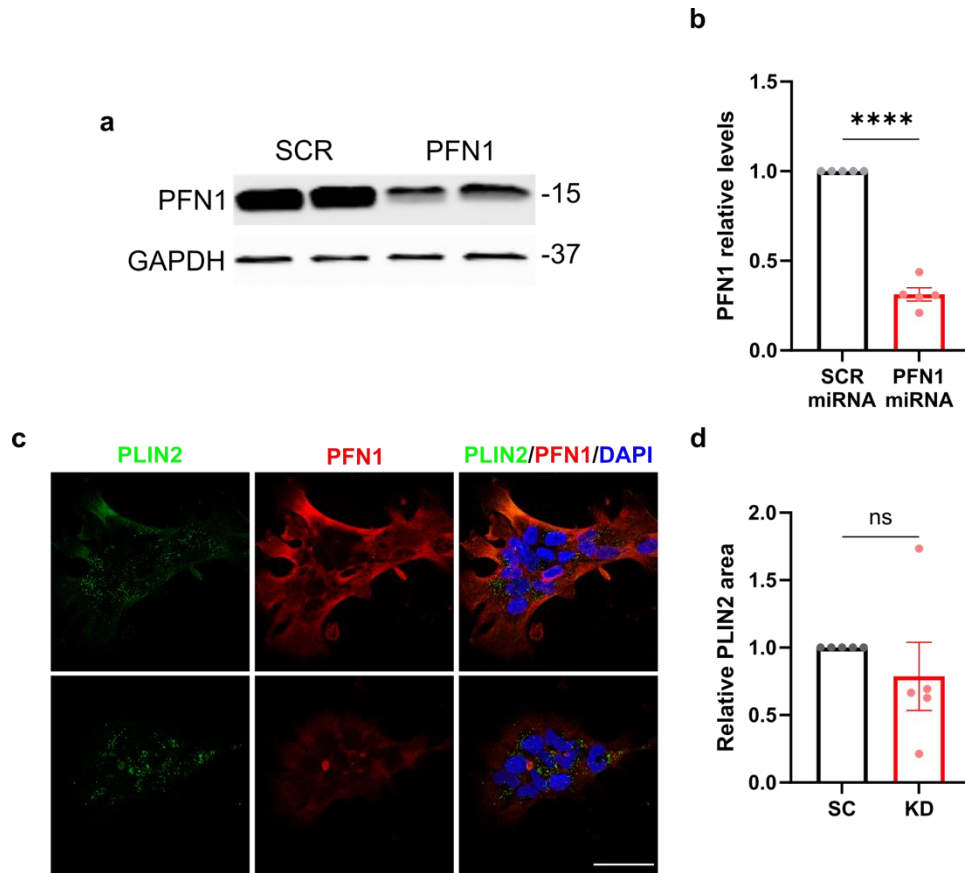

**Supplemental Figure 5. PFN1 knockdown does not correlate with an increase in lipid droplet accumulation in HMC3 microglial cells.** PFN1 knockdown in HMC3 cells using miRNAs targeting *PFN1* or a scrambled (SCR) sequence for n=5 independent experiments. **a**, Representative Western blot of PFN1 and GAPDH used as loading control. **b**, Quantification of PFN1 (\*\*\*\* $P < 0.0001$ ,  $t = 18.88$ ,  $df = 8$ ) levels from Western blots exemplified in **a**. PFN1 levels were normalized to GAPDH and to SCR controls for each independent experiment. **c-d** Immunofluorescence analysis of lipid droplet accumulation in HMC3 cells with SCR or PFN1 miRNA. **c**, Representative immunofluorescent images of PLIN2 and PFN1. Scale bar: 50 $\mu$ m. **d**, Quantification of the area of PLIN2 fluorescent punctate signal representing lipid droplets was normalized to SCR miRNA HMC3s within each independent experiment (ns  $P = 0.4231$ ,  $t = 0.8442$ ,  $df = 8$ ). All graphs show mean  $\pm$  SEM. Data points in bar graphs represent individual experiments. Statistics were performed by unpaired two-tailed t-test. Source data are provided as a Source Data file.

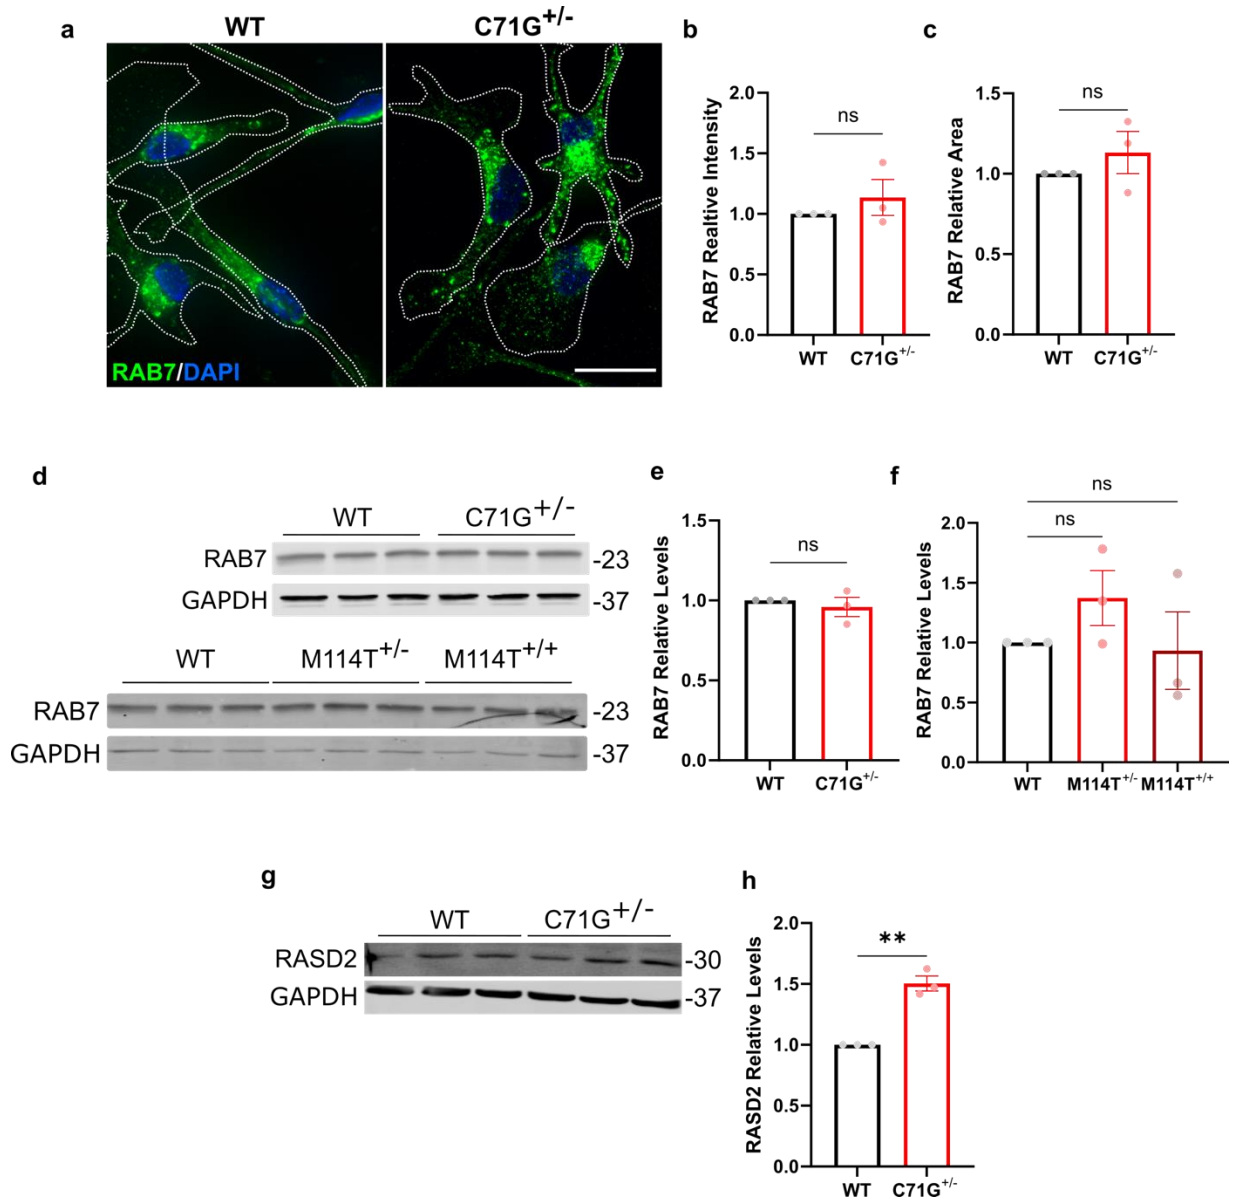

**Supplemental Figure 6. Additional validations related to RNASeq analyses of PFN1 iMGs.** **a-c**, Immunofluorescence analysis of RAB7 in WT and PFN1 C71G<sup>+/-</sup> iMGs (n=3 independent differentiations). **a**, Representative immunofluorescence images. Cell boundaries defined by anti-PFN1 staining (not shown for clarity) are depicted with white dashed lines. Scale bar=50  $\mu$ m. **b,c**, Quantification of the mean intensity (**b**, ns  $P=0.4094$ ,  $t=0.9205$ ,  $df=4$ ) and area (**c**, ns  $P=0.3701$ ,  $t=1.009$ ,  $df=4$ ) of RAB7 immunofluorescence signal analyzed on a per cell basis. Mutant iMG data were normalized to the corresponding WT condition within the same experimental differentiation.



**d**, Western blot analysis of RAB7 with GAPDH used as a loading control for cell lysates derived from C71G<sup>+/-</sup>, M114T<sup>+/-</sup>, M114T<sup>+/+</sup> iMGs and their respective WT iMG counterpart (n=3 independent differentiations). **e**, Quantification of **d** for WT and C71G<sup>+/-</sup> iMGs (ns  $P=0.5405$ ,  $t=0.6683$ ,  $df=4$ ). **f**, Quantification of **d** for WT, M114T<sup>+/-</sup> and M114T<sup>+/+</sup> iMGs (ns  $P=0.2518$ ,  $q=1.633$ ,  $df=6$  for WT vs M114T<sup>+/-</sup> and ns  $P=0.7486$ ,  $q=0.6546$ ,  $df=6$  for WT vs M114T<sup>+/+</sup>). For each independent differentiation, RAB7 protein levels were normalized to the levels of the respective WT controls from the same experimental differentiation. **g**, Western blot analysis of RASD2 including GAPDH loading control for cell lysates derived from C71G<sup>+/-</sup> and WT iMGs (n=3 independent differentiations). **h**, Quantification of **g** (\*\* $P=0.0012$ ,  $t=8.148$ ,  $df=4$ ). For each independent differentiation, RASD2 protein levels were normalized to the levels of the respective WT controls from the same experimental differentiation. All bar graphs show mean  $\pm$  SEM with individual data points representing independent differentiations. Statistics were determined using unpaired two-tailed t-test for WT vs C71G<sup>+/-</sup> iMGs comparisons and ordinary one-way ANOVA with Dunnett's multiple comparisons test for WT vs M114T<sup>+/-</sup> and M114T<sup>+/+</sup> comparisons. Source data are provided as a Source Data file.

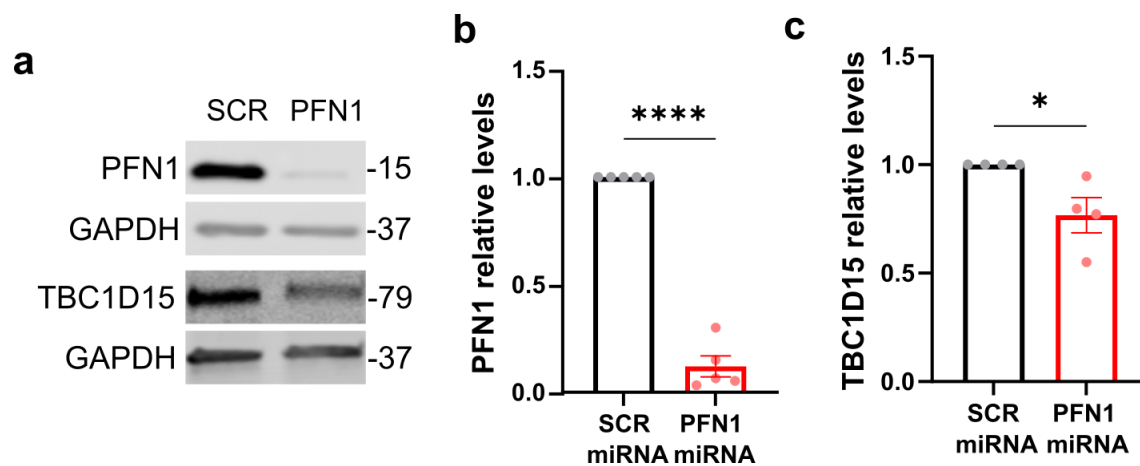

**Supplemental Figure 7. PFN1 knockdown in HMC3 microglia cells correlates with reduced TBC1D15 levels.** PFN1 knockdown in HMC3 cells using miRNAs targeting *PFN1* or a scrambled (SCR) sequence for n=5 independent experiments. **a**, Representative Western blot of PFN1, TBC1D15 and GAPDH, used as loading control. **b**, Quantification of PFN1 (\*\*\*\* $P<0.0001$ ,  $t=17.82$ ,  $df=8$ ) levels from Western blots exemplified in **a**. **c**, Quantification of TBC1D15 (\* $P=0.0289$ ,  $t=2.857$ ,  $df=6$ ) as described in **b**. **b,c**, The indicated protein was normalized to GAPDH and to SCR controls for each independent experiment. All graphs show mean  $\pm$  SEM. Data points in bar graphs represent individual experiments. Statistics were performed by unpaired two-tailed t-test. Source data are provided as a Source Data file.



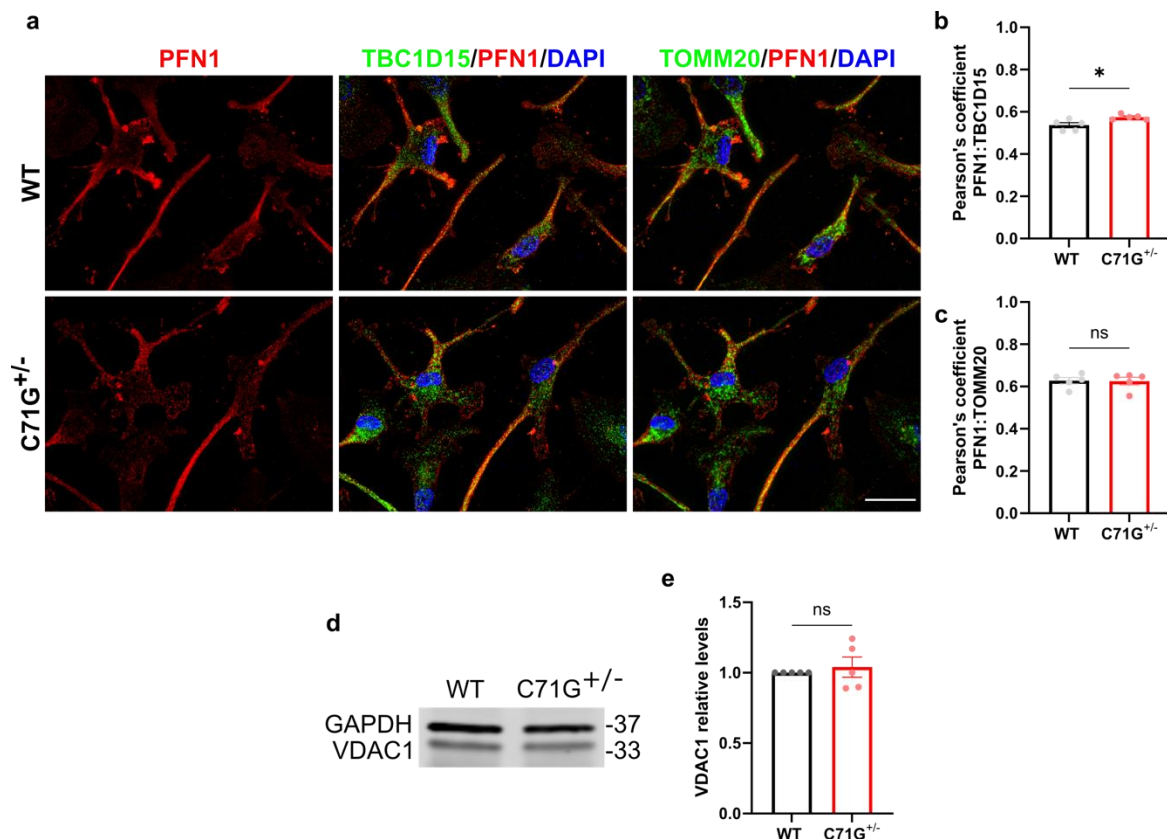

**Supplemental Figure 8. Colocalization analysis of PFN1 with TBC1D15 and TOMM20 and mitochondrial levels in PFN1 WT and C71G<sup>+/-</sup> iMGs.** **a-c**, Colocalization of PFN1 with TBC1D15 and TOMM20 signal as determined by immunofluorescence analysis from n=4 independent differentiations. **a**, Representative immunofluorescence images of PFN1, TBC1D15, and TOMM20 staining in PFN1 WT and C71G<sup>+/-</sup> iMGs. **b,c**, Pearson's correlation coefficient of PFN1 and TBC1D15 signal (**b**,\*  $P = 0.0181$ ,  $t=2.961$ ,  $df=8$ ) and PFN1 and TOMM20 signal (**c**, ns  $P=0.9261$ ,  $t=0.09571$ ,  $df=8$ ). **d**, VDAC1 protein expression in PFN1 WT and C71G<sup>+/-</sup> iMGs determined by Western blot analysis. **e**, Quantification of **d**. VDAC1 levels were normalized to GAPDH and then to the levels of the respective WT line from the same differentiation (ns  $P=0.5898$ ,  $t= 0.5615$ ,  $df=8$ ) for n=5 independent differentiations. All bar graphs show mean  $\pm$  SEM where each data point represents an independent differentiation. Statistics were determined using an unpaired two-tailed t-test. Source data are provided as a Source Data file.

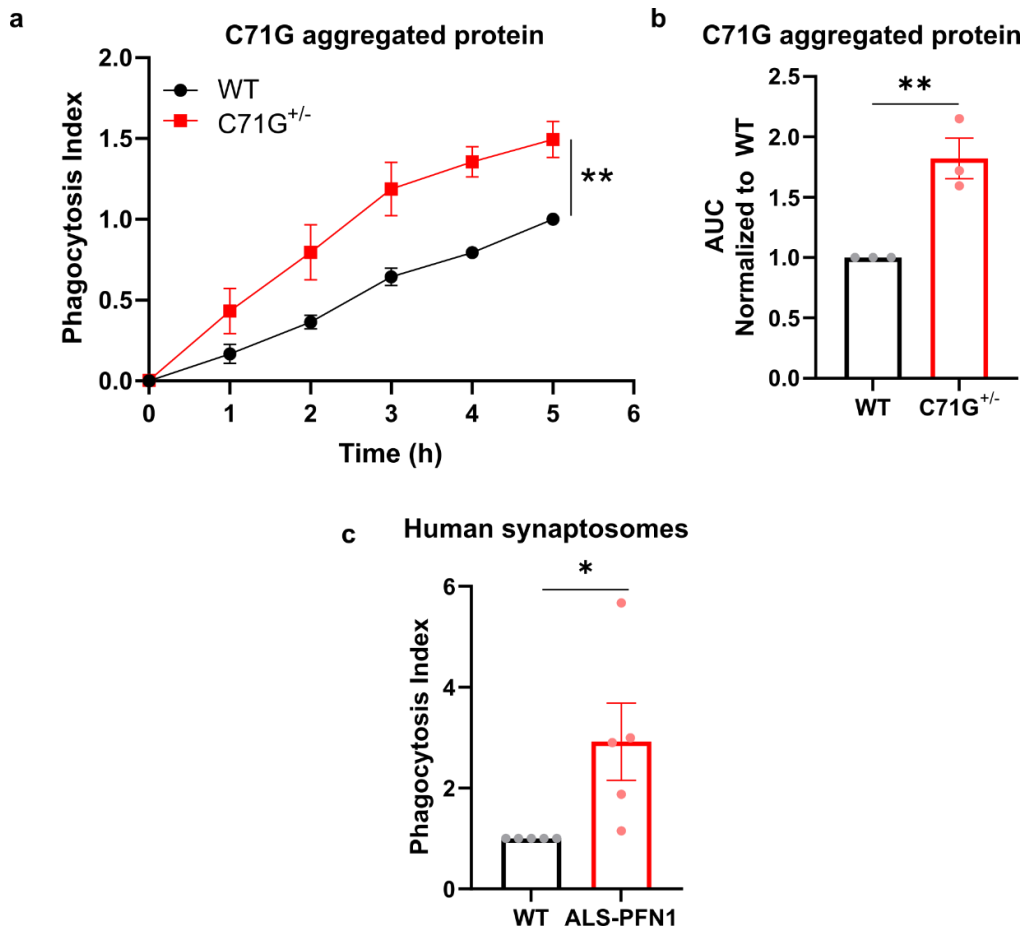

**Supplemental Figure 9. Differential phagocytosis indices for ALS-PFN1 and WT iMGs upon administration of disease-relevant substrates.** **a-c**, Live-cell phagocytosis assays using pHrodo-labeled disease-relevant substrates. **a**, Quantification of the phagocytosis index (see Methods) for WT and C71G<sup>+/-</sup> iMGs (n=3 independent differentiations) in the presence of pHrodo-labeled PFN1 C71G aggregated purified protein over a time course of 5h (paired two-tailed t-test, \*\**P*= 0.0072, *t*=4.376, *df*=5). **b**, Area under the curve (AUC) determined from **a** (unpaired two-tailed t-test, \*\**P*= 0.0082, *t*=4.881, *df*=4). **c**, Quantification of the phagocytosis index for C71G<sup>+/-</sup> (n=3 independent differentiations) and M114T<sup>+/-</sup> (n=2 independent differentiations), referred to collectively as “ALS-PFN1”, and their respective WT controls (n=5 independent differentiations) in the presence of human synaptosomes after 2h of phagocytosis (unpaired two-tailed t-test, \**P*= 0.0369, *t*=2.501, *df*=8). Mutant iMG data was normalized to the levels of the respective WT control from the same experimental differentiation. All graphs show mean ± SEM with individual data points representing independent differentiations. Source data are provided as a Source Data file.

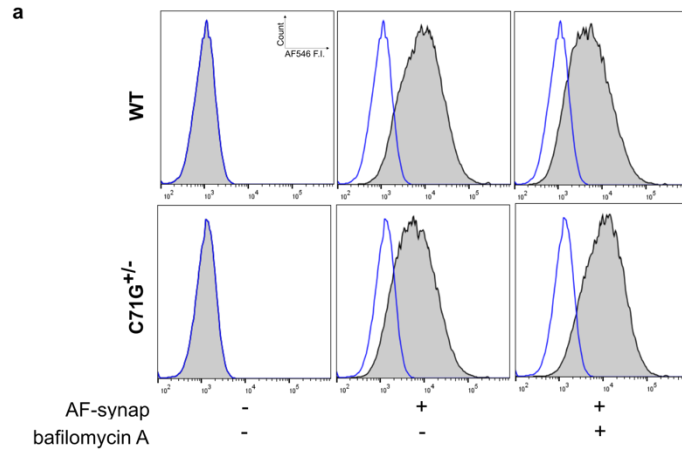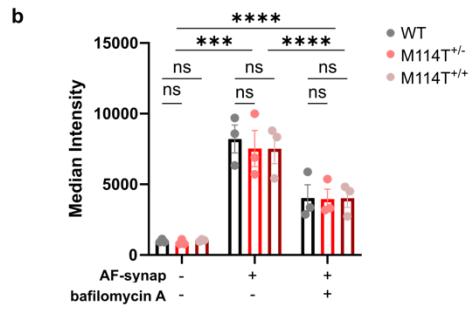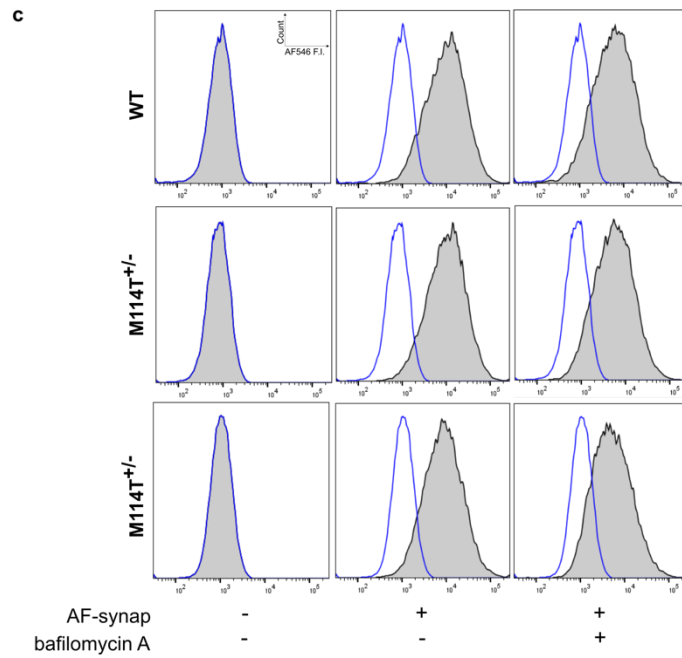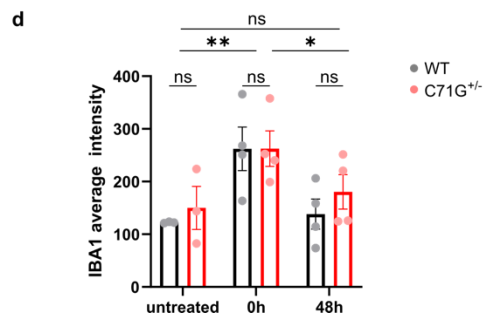

**Supplemental Figure 10. Analysis of synaptosome uptake and IBA1 levels across the washout assay. a-c**, Synaptosome uptake measured by flow cytometry in PFN1 WT and C71G<sup>+/-</sup> (and PFN1 WT, M114T<sup>+/-</sup>, and M114T<sup>+/+</sup> iMGs (n=3 independent differentiations for each line). **a**, Representative fluorescence histograms from flow cytometry depicting uptake of AF546-labeled synaptosomes (AF-synap) by WT and C71G<sup>+/-</sup> iMGs. AF-synap intensity is shown in the X-axis. Histograms of iMGs without synaptosomes (shown in blue without shading) are compared to histograms of iMGs incubated with synaptosomes with or without pre-treatment with BafA (shown in black with shading). **b**, Quantification of flow cytometry assay measuring uptake of AF-synap in WT, M114T<sup>+/-</sup>, and M114T<sup>+/+</sup> iMGs. No WT vs M114T<sup>+/-</sup> or WT vs M114T<sup>+/+</sup> comparisons were statistically significant (two-way ANOVA with Šídák's multiple comparisons test). iMGs pre-treated with BafA showed an attenuation but not removal of uptaken AF-synap (\*\*\*\* $P < 0.0001$ ,  $t = 5.846$ ,  $df = 18$  for +BafA vs -BafA). Additional statistical comparisons are in **Data S1**. Data points in the graph represent independent differentiations. **c**, Representative fluorescence histograms from flow cytometry for WT, M114T<sup>+/-</sup>, and M114T<sup>+/+</sup> iMGs as described in **a**. **d**, Quantification of IBA1 mean intensity before addition of synaptosomes (untreated), 0h and 48h post-synaptosome washout as indicated in **Figure 4f**. No WT vs C71G<sup>+/-</sup> comparisons were statistically significant (two-way ANOVA with Šídák's multiple comparisons test; ns  $P = 0.9386$ ,  $t = 0.5268$  for untreated; ns  $P = > 0.9999$ ,  $t = 0.006518$  for 0h and ns  $P = 0.7478$ ,  $t = 0.9261$  for 48h;  $df = 16$  for all groups). IBA1 intensity is increased at 0h post-washout and returns to initial levels at 48h post-washout (two-way ANOVA with Tukey's multiple comparison test; \*\*  $P = 0.0062$ ,  $q = 5.110$ ,  $df = 16$ ; \*  $P = 0.0150$ ,  $q = 4.504$ ,  $df = 16$ ; ns  $P = 0.7867$ ,  $q = 0.9404$ ,  $df = 16$ ). Immunofluorescence signal was analyzed on a per cell basis for n=3-4 independent differentiations. All bar graphs show mean  $\pm$  SEM. Source data are provided as a Source Data file.

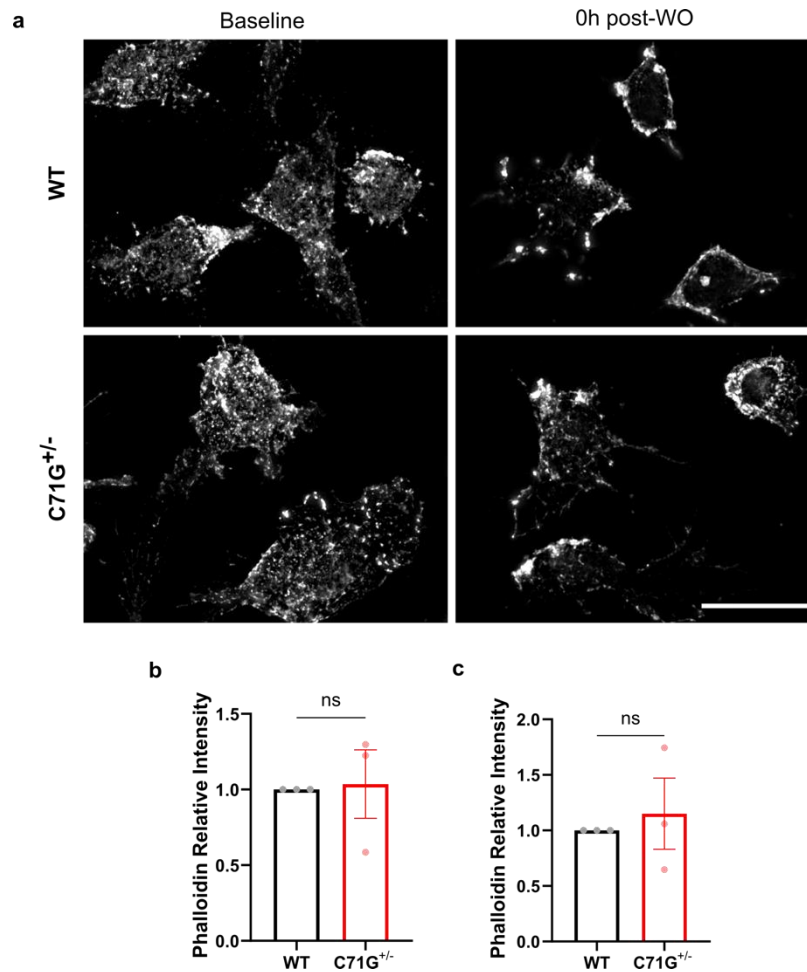

**Supplemental Figure 11. Analysis of F-actin detected by phalloidin staining of PFN1 C71G<sup>+/-</sup> and WT iMGs subjected to the live-cell phagocytosis assay.** **a**, Representative immunofluorescence images of phalloidin staining of PFN1 WT and C71G<sup>+/-</sup> iMGs before administration of human synaptosomes (baseline) and immediately after synaptosomes were washed out (0h post-WO). Scale bar: 25  $\mu$ m **b,c**, Quantification of phalloidin mean fluorescent intensity for baseline (**b**) and 0h post-WO (**c**). Data from C71G<sup>+/-</sup> iMGs was normalized to that of WT iMGs within the same experimental differentiation. All graphs show mean  $\pm$  SEM with individual data points representing n=3 independent differentiations. Unpaired two-tailed t-test was used for all statistical comparisons (**b**, ns  $P=0.8882$ ,  $t=0.1591$ ,  $df=2$  and **c**, ns  $P=0.6621$ ,  $t=0.4711$ ,  $df=4$ ). Source data are provided as a Source Data file.

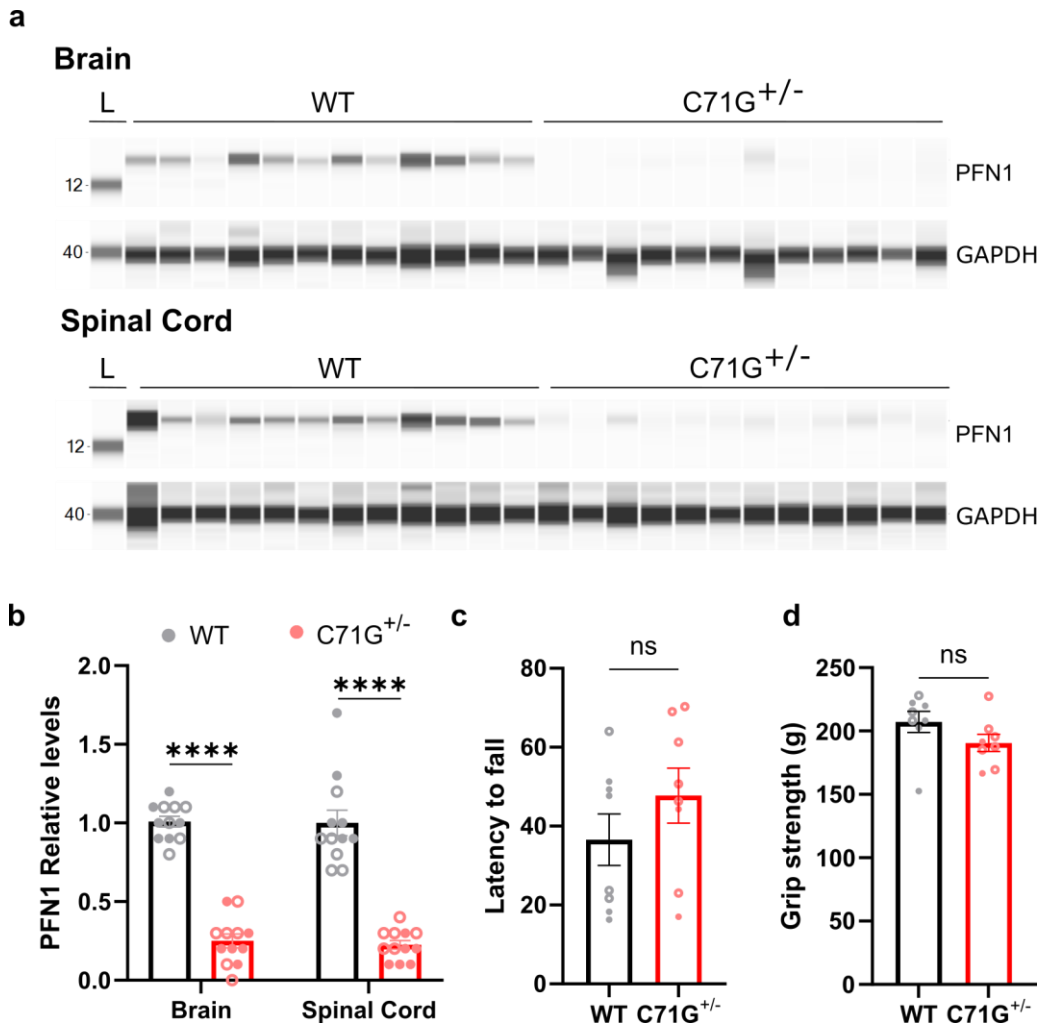

**Supplemental Figure 12. Characterization of ALS-PFN1 mice.** **a**, Capillary Western lane view image showing a ladder (L) as well as PFN1 and GAPDH (loading control) levels in brain and spinal cord lysates from  $n = 12$  WT control (6 male, 6 female) and 12 PFN1 C71G<sup>+/-</sup> (6 male, 6 female) mice. **b**, Quantification of PFN1 levels in brain (\*\*\*\* $P = <0.0001$ ,  $t = 10.48$ ,  $df = 44$ ) and spinal cords (\*\*\*\* $P = <0.0001$ ,  $t = 10.71$ ,  $df = 44$ ) from **a**. Two-way ANOVA with Šídák's multiple comparisons test was used for statistical comparisons. **c-d** Motor function assessment of WT and PFN1 C71G<sup>+/-</sup> animals. Two-tailed unpaired t-test was used for statistical comparisons. **c**, Latency to fall in a Rotarod test (ns  $P = 0.2604$ ,  $t = 1.173$ ,  $df = 14$ ). **d**, Grip strength of all four limbs (ns  $P = 0.1450$ ,  $t = 1.544$ ,  $df = 14$ ). Two-tailed unpaired t test was used for statistical comparisons in **c,d**. Bar graphs show mean  $\pm$  SEM. Data points represent individual animals. Open symbols for males and closed symbols for females. Source data are provided as a Source Data file.

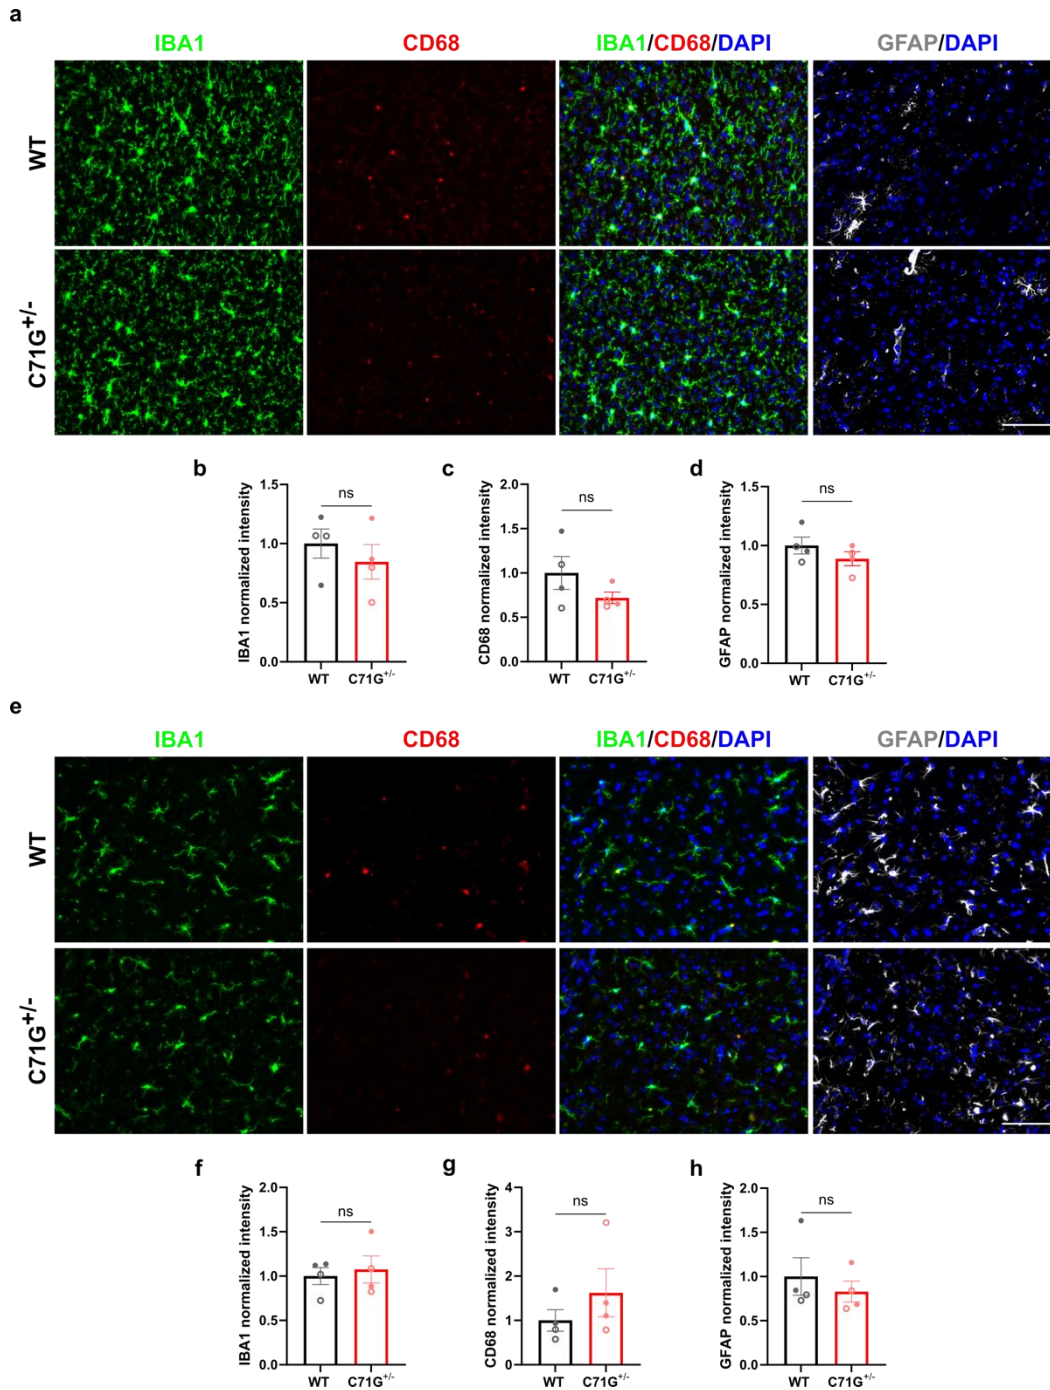

**Supplemental Figure 13. Glial marker expression is similar between aged WT and ALS-PFN1 mice.** **a**, Representative immunofluorescence images of IBA1 (green), CD68 (red) and GFAP (grey) staining in motor cortex of WT and PFN1 C71G<sup>+/-</sup> mice. Note that GFAP images were acquired separately from Iba1/CD68. Scale bar: 100  $\mu$ m. **b-d**, Quantification of the normalized intensity with respect to the average of the total signal intensity in the WT mice for IBA1 (**b**, ns  $P=0.4521$ ,  $t=0.804$ ,  $df=6$ ), CD68 (**c**, ns  $P=0.2037$ ,  $t=1.426$ ,  $df=6$ ), and GFAP (**d**, ns  $P=0.2714$ ,  $t=1.211$ ,  $df=6$ ). **e**, Representative immunofluorescence images of spinal cord as



described in **a**. Scale bar: 100  $\mu\text{m}$ . **f-h**, Quantification of normalized intensity as mentioned above for IBA1 (**f**, ns  $P=0.6918$ ,  $t=0.416$ ,  $df=6$ ), CD68 (**g**,  $P=0.3349$ ,  $t=1.048$ ,  $df=6$ ) and GFAP (**h**, ns  $P=0.5103$ ,  $t=0.700$ ,  $df=6$ ). Unpaired two-tailed t-test was used for all statistical comparisons. Graphs in this figure show mean  $\pm$  SEM from  $n=4$  WT (2 male, 2 female) and 4 C71G<sup>+/-</sup> (2 male, 2 female) mice. Data points represent individual animals, with open symbols for males and closed for female. Source data are provided as a Source Data file.

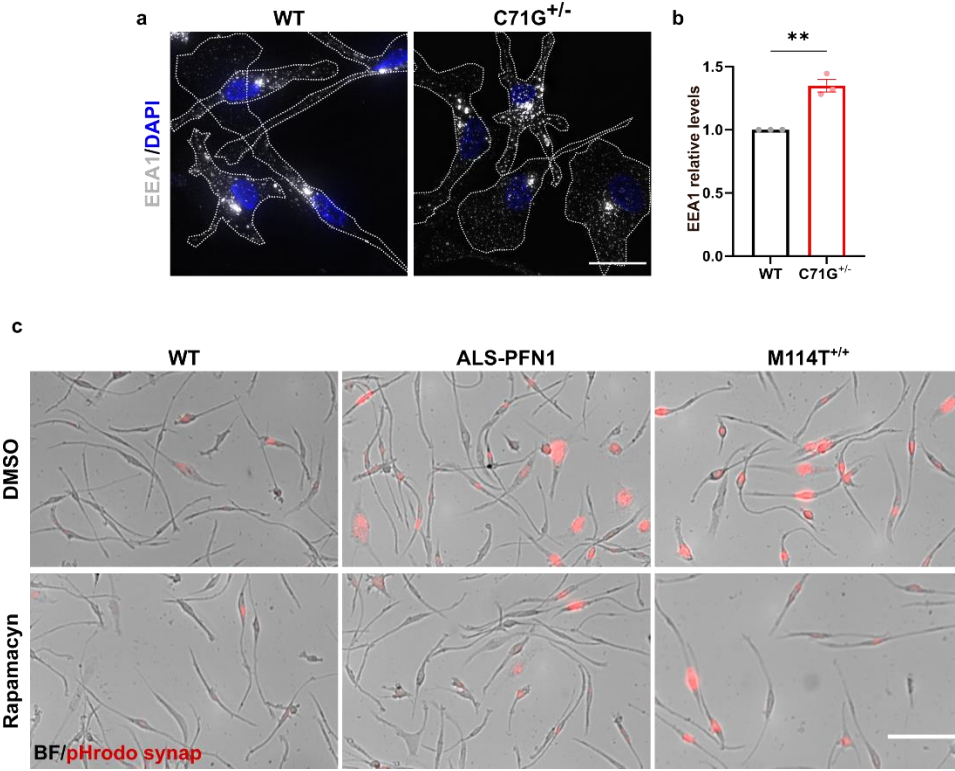

**Supplemental Figure 14. EEA1 levels at baseline and live-cell phagocytosis assay after rapamycin treatment in PFN1 C71G<sup>+/-</sup> and WT iMGs.** **a**, Representative immunofluorescence images of EEA1 ( $n=3$  independent differentiations) for PFN1 WT and C71G<sup>+/-</sup> iMGs. **b**, Quantification of the EEA1 signal intensity measured per cell and normalized to WT iMGs (\*\* $P=0.0021$ ,  $t=7.070$ ,  $df=4$ ). Data points represent independent differentiations. **c**, Representative live-cell images of phagocytosis assay after 8h of incubation with pHrodo-labeled mouse synaptosomes (pHrodo synap) treated with DMSO or 0.1 $\mu\text{M}$  rapamycin for WT, M114T<sup>+/-</sup> (ALS-PFN1) and M114T<sup>+/-</sup> iMGs. Cellular morphology is depicted by bright field (BF) images merged with pHrodo synap signal in red. Scale bar= 25 $\mu\text{m}$ . Source data are provided as a Source Data file.

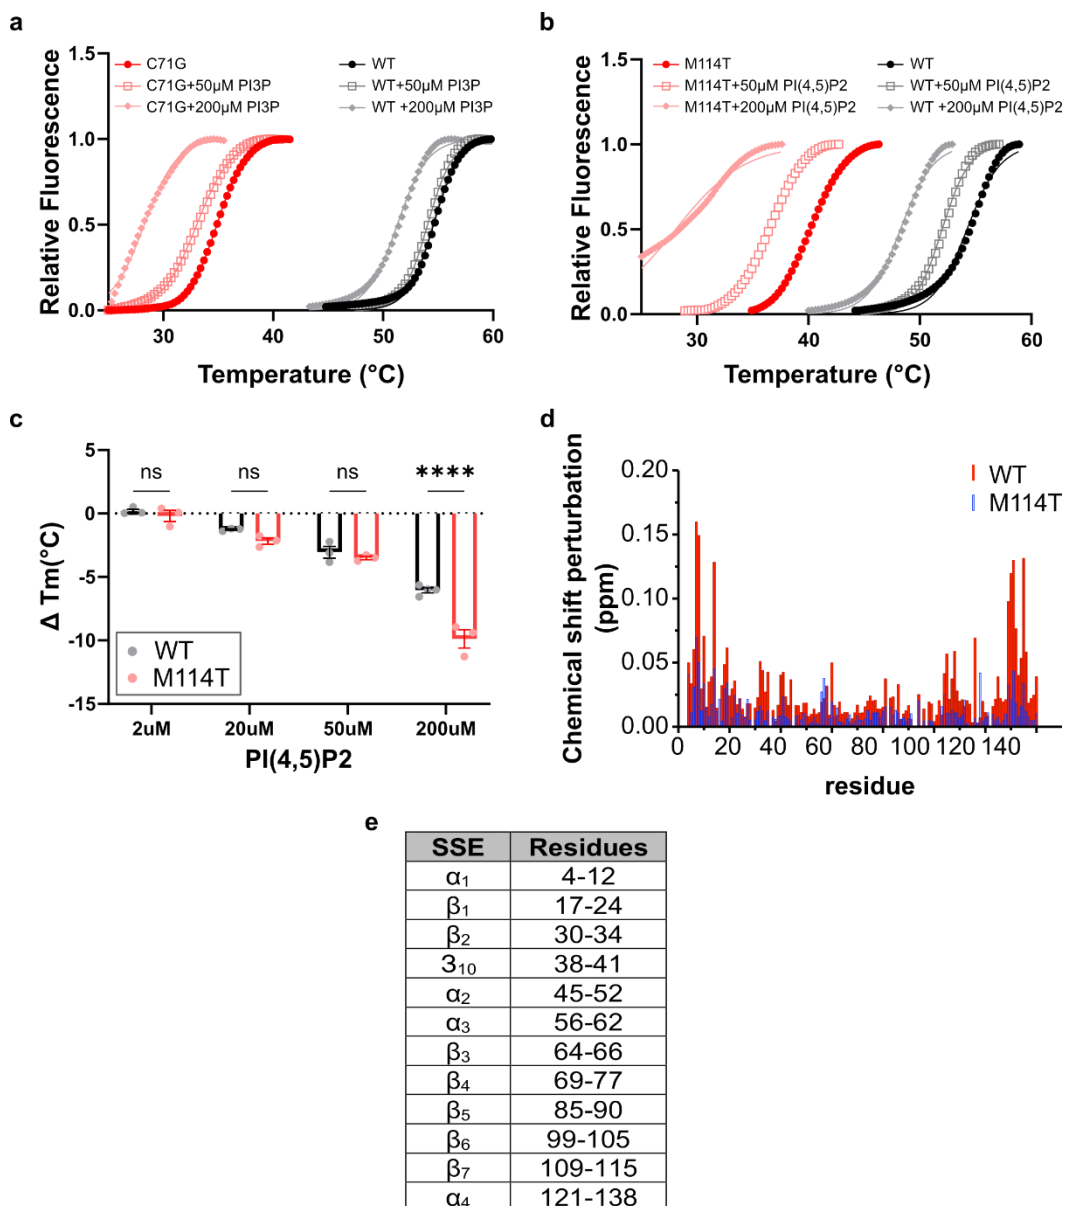

**Supplemental Figure 15. Additional data pertaining to binding of purified PFN1 variants with phosphoinositides.** **a,b**, Thermal denaturation profiles of PFN1 proteins incubated with different concentrations of PI3P measured by SYPRO Orange fluorescence as a function of increasing temperature as described for main text **Figure 8** for PFN1 C71G (**a**) and M114T (**b**). An average of two technical replicates is shown, which are representative of n=3-4 independent experiments for **b**. The curves were fit with the Boltzmann's sigmoidal function to determine an apparent melting temperature ( $T_m$ ). **c**,  $\Delta T_m$  reflects the difference between the  $T_m$  of the PFN1 M114T variant with the indicated concentration of PI(4,5)P2 and the  $T_m$  of that PFN1 variant without PI(4,5)P2. Statistics were determined using two-way ANOVA  $F(1, 28) = 7.115$  and Šidák's multiple comparisons test (\*\*\*\*  $P < 0.0001$  and ns  $P = 0.2851, 0.7847$ ). Bar graph shows mean  $\pm$

SEM with each data point representing an independent experiment. **d,e**, Additional information for the NMR titration studies of PFN1 with PI3P as described in main text **Figure 8 d**, Chemical shift perturbation (ppm) for each residue of PFN1 between the free and the PI3P-bound state for PFN1 WT (red lines) and PFN1 M114T (blue lines). The secondary structural elements (SSE) formed by the indicated PFN1 sequences are shown and defined as per<sup>1</sup>. Source data are provided as a Source Data file.

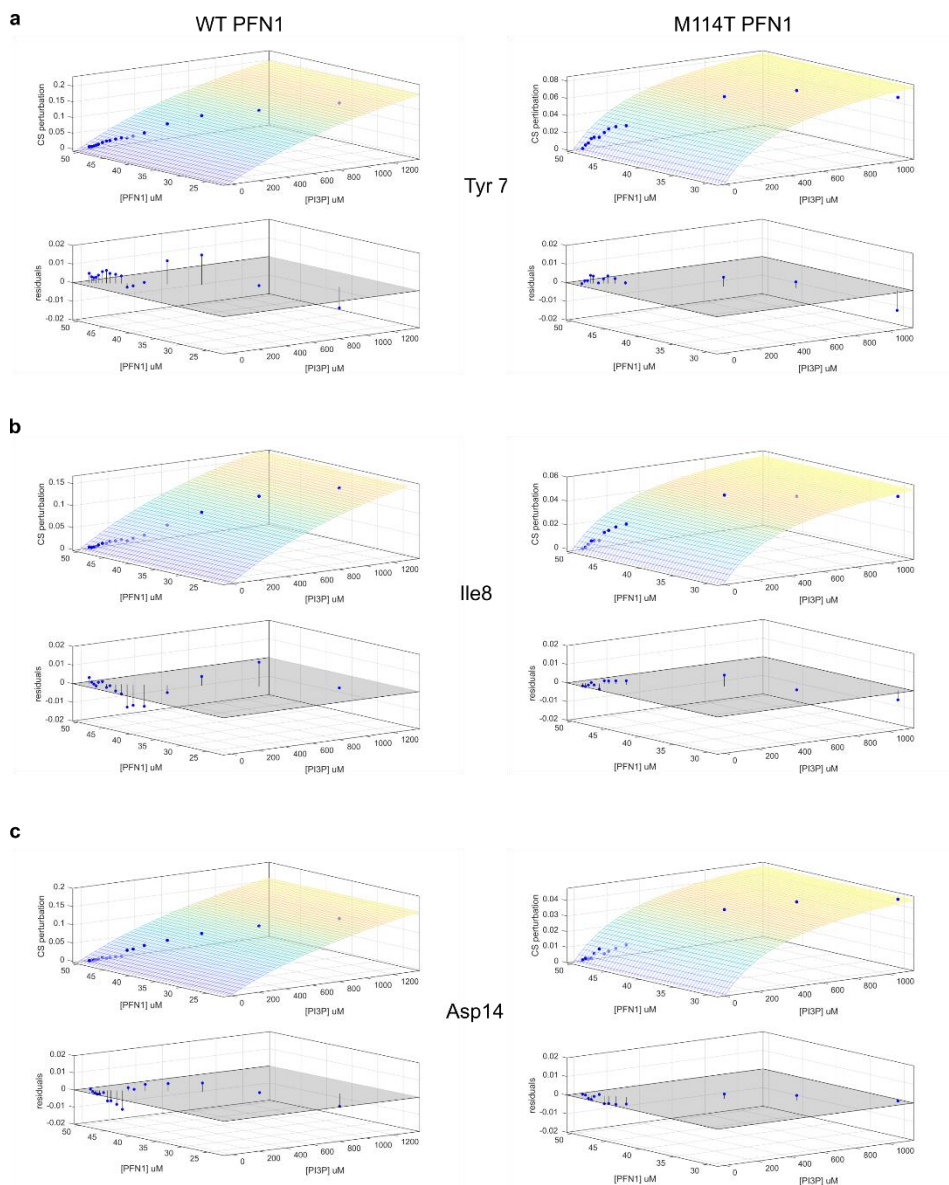

**Supplemental Figure 16. Representative residuals of the MATLAB fits for the NMR titration data for PFN1 with PI3P.** The change in chemical shift (CS perturbation in ppm) for the indicated PFN1 residue (Tyr 7, Ile8 and Asp14) is plotted as a function of PFN1 concentration ( $\mu\text{M}$ ) and PI3P concentration for both PFN1 WT (left column) and PFN1 M114T (right column). The resultant titration curves were fitted in MATLAB to obtain a dissociation constant as described in the methods. Residuals of the fitting are shown in blue. Source data are provided as a Source Data file.

#### **SUPPLEMENTARY REFERENCES**

1. Schmidt, E.J. et al. ALS-linked PFN1 variants exhibit loss and gain of functions in the context of formin-induced actin polymerization. *Proceedings of the National Academy of Sciences* **118**(2021).
