# Supplementary material for: Expression of ALS-PFN1 impairs vesicular degradation in iPSC-derived microglia
Source: PubMed Central journal article supplement (PMC10954694; doi:10.1038/s41467-024-46695-w), 2024-03-20
Supplement: 41467_2024_46695_MOESM3_ESM.pdf [file 41467_2024_46695_MOESM3_ESM.pdf]

## Description of Additional Supplementary Files

**Data S1. Additional statistical analysis for this study.** The file contains results for statistical analysis in: **Figure 1c**, statistics for C71G<sup>+/-</sup> cells (iMGs vs PMPs and iPSCs) using two-way ANOVA and Šídák's multiple comparisons test. **Figure 1e**, additional comparisons not listed in the main text figure for WT iMGs and all comparisons for PFN1 C71G<sup>+/-</sup> iMGs, including LPS treated versus untreated conditions, using two-way ANOVA and Šídák's multiple comparisons test. **Sup. Figure 3**, additional comparisons not listed in Supplementary Figure 3 for WT iMGs and all comparisons for PFN1 M114T<sup>+/-</sup> and M114T<sup>+/+</sup> iMGs, including LPS treated versus untreated conditions, using two-way ANOVA and Šídák's multiple comparisons test. **Figure 4b and d**, the indicated comparison was assessed by two-way ANOVA followed by Tukey's multiple comparisons for WT vs C71G<sup>+/-</sup> iMGs (**b**) and WT vs M114T<sup>+/-</sup> vs M114T<sup>+/+</sup> iMGs (**d**). **Figure 4i**, statistics for WT vs C71G<sup>+/-</sup> iMGs within each treatment condition and additional comparisons not listed in main text figure across different treatment conditions, using two-way ANOVA and Šídák's multiple comparisons test. **Sup. Figure 7**, Additional comparisons not listed in Supplementary Figure 7 as in Figure 4i. **Figure 7e**, Additional comparisons not listed in the main text figure for WT iMGs untreated vs rapamycin and C71G<sup>+/-</sup> iMGs for both untreated vs rapamycin and untreated vs bafilomycin A.

**Data S2. Results of the differential expression analysis of C71G<sup>+/-</sup> vs WT iMGs using quantitative proteomics.** Data resulting from the mass spectrometry experiment using tandem mass tag (TMT) quantitative proteomics to identify differentially expressed proteins between PFN1 WT and C71G<sup>+/-</sup> iMGs. PFN1 WT iMGs was used as the reference condition. Data was analyzed using Scaffold Software as described in the methods. Statistics were determined using T-test and Benjamin-Hochberg correction for multiple testing. Differentially expressed proteins in herein have a *P*-value < 0.00160 and are considered statistically significant with the Benjamin-Hochberg test.

**Data S3. Functional enrichment analysis of differentially expressed proteins identified from the quantitative proteomics study.** Enriched pathways identified using the Bioplanet 2019 library by Enrichr. Differentially expressed proteins used for this analysis are listed in **Data S2**.

**Data S4. Enrichr and Metascape analyses of differentially expressed proteins from the quantitative proteomics study.** Enrichr (KEEG pathway and Gene Ontology cellular component) and Metascape were used to determine enriched functional terms from the differentially expressed proteins listed in **Data S2**. The results of each analysis are presented in different tabs.

**Data S5. Results of differential gene expression analysis from the RNASeq dataset.** RNAseq data obtained from C71G<sup>+/-</sup> (CG) and M114T<sup>+/-</sup> (MThet) iMGs (ALS-PFN1 group) and WT controls (WT and WT2) were analyzed using DESeq2 package and Wald test.

**Data S6. Information for antibodies used herein.** The target, antibody species, clone information, supplier, catalog number (#), lot number, application and working dilution are provided.

**Supplementary Code 1.** ImageJ analysis script used to measure Iba1 signal in dead neuron injections tissue.
